# Supplementary material for: The Capercaillie (Tetrao urogallus): an iconic focal species for knowledge-based integrative management and conservation of Baltic forests
Source: Springer Nature journal article supplement (doi:10.1007/s10531-016-1223-6), 2016-10-17
Supplement: MOESM2 [file 10888230]

The Capercaillie (*Tetrao urogallus*) ‒ An iconic focal species for knowledge-based integrative management and conservation of Baltic forests

**Online Resource 2**

**JVC “Latvia’s State Forests” (LVM) guidelines for forest management at Capercaillie (*Tetrao urogallus L.*) lek areas**

1. The planning area

The guidelines apply to nested ecological units that are derived from the locations of lekking Capercaillie cocks (leks; Fig. S2). *Lek area* is the largest unit (up to 300 ha), which refers to a distinct forest territory (determined by natural conditions) where Capercaillie traditionally spend the lekking season. Most individuals use this territory throughout their life. *Lek site* is thecentral part of the lek area (20‒30 ha in size) where the males gather to display and to copulate with females. *Lek centre* is a place where most Capercaillie matings take place (1‒3 ha); it is typically inhabited by a dominant male and its location may thus shift between years.

**Lek site surveys** are interpreted according to the following GIS-based procedure: (i) all observations of lekking Capercaillie cocks are registered on a map (mainly by using GPS); (ii) individual lekking territories are delineated as circular buffers (200 m radius) around each observation; (iii) the territories (circles) that overlap are merged into one polygon; (iv) the final polygon is interpreted for planning purposes as the ‘lek site’ and its geometric centre is used as the approximation to ‘lek centre’; (v)‘lek area’ is preliminarily delineated as the 1000-m circular area around the lek centre but its borders can be adjusted based on field surveys of the habitat (e.g., they should not divide forest compartments).

Two years prior to commencement of any management activity within the designated lek area, a **re-survey** must update its boundaries and the borders of the lek site. The latter can divide forest compartments if necessary. The outer boundary of the lek area is not adjusted if the lek centre has not shifted more than 200 m. To assess efficiency of management measures and progress in achievement of goals, **monitoring** is carried out in Capercaillie lek areas in accordance with LVM environmental monitoring guidelines.

**
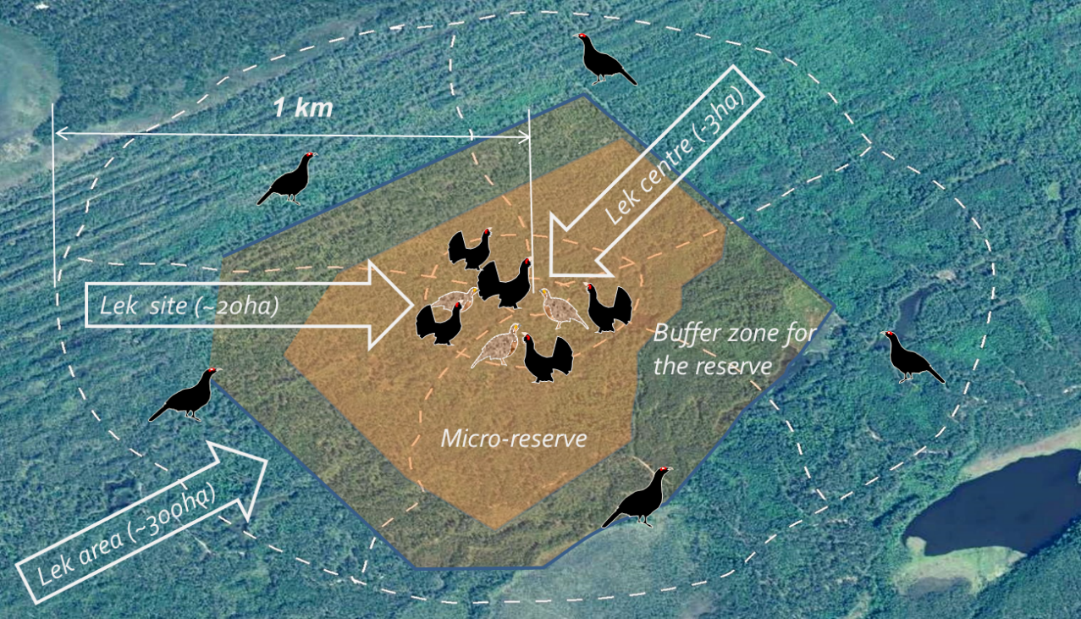
**

**Fig. S2**. The scheme of protection zoning (colours) in relation to spatial distribution of lekking Capercaillie in Latvian state forests. Dashed lines depict approximate territories of individual males in the mating season, with the central mating area shown separately.

2. Management requirements

*2.1. Management of the lek area*

Within the lek area possessed or owned by LVM, forest management should ensure that at least 60% of pine forest stands are older than 60 years. In the part of the lek area, which is outside the lek site, micro-reserve and its buffer zone:

- - - - the maximum area of **clear felling** can be 5 ha, and its borders should be irregular (guided by relief terrain lines or neighboring forest stands). Clear felling is not planned <100 m of an existing clearcut or forest stand <6 m in height when the total area of these patches (incl. the planned felling area) would exceed 5 ha;
      - **selection cutting** is not planned on pine sites where the growing conditions do not allow natural regeneration with pine. When performed, selection cutting of pine stands should retain 7‒9 overstorey or second-storey spruce trees per hectare solitarily or in two groups (0.08-0.1 ha each), and additionally 10 - 15 undergrowth spruces per hectare;
      - at **commercial thinning** of pine stands, the basal area is reduced to the minimum level specified by the Cabinet of Ministers, while retaining trees with thick branches. Thinnings in the following pine forest types should retain 10-15 spruces per hectare solitarily or in two groups (0.08-0.1 ha each): *Cladinoso-callunosa, Vacciniosa, Vaccinioso - sphagnosa, Callunosa turf.mel., Vacciniosa turf.mel., Callunosa mel., Vacciniosa mel.*;
      - at the **last pre-commercial thinning** of pine stands, the tree density is reduced to the minimum level specified by Cabinet of Ministers and, in the following pine forest types, 10‒15 spruces per hectare should be retained: *Cladinoso-callunosa, Vacciniosa, Vaccinioso - sphagnosa, Callunosa turf.mel., Vacciniosa turf.mel., Callunosa mel., Vacciniosa mel.*;
- for **stand regeneration**, whenever possible naturally or technically, (i) felling residues are removed at clear felling; (ii) pine is planned as the priority species; and (iii) pine stands are restored in a natural way.
- the following situations will be resolved according to **case-specific prescriptions by environmental experts**: (i)reconstruction and maintenance of forest amelioration systems or construction and reconstruction of forest motor roads requires environmental impact assessment; (ii) joint stakeholder decision is required when the management is planned in a compartment that hosts other specially protected species or protected habitats. When the planned management contradicts with the requirements of those protected values, it shall be only carried out if Capercaillie protection is top prioritized at this site; (iii) expert opinion forms the basis for managing disturbance areas (windfall, snow-break damage, etc.) where the general guidelines cannot be applied.
- when re-surveys expand the lek area to previously planned and already prepared felling sites, which do not correspond to the guidelines, only the timing of the felling will be adjusted (see Section 2.3).

*2.2. Management of lek sites and micro-reserves*

Minimum requirements for the forest management regime in Capercaillie micro-reserves and their buffer zones are approved by the Cabinet of Ministers. Additional site-specific restrictions and management decisions within designated lek sites and micro-reserves can be provided by a bird protection expert.

The characteristics considered (within a 20-year time) and over at least 50% of the territory include: (i) the tree density in young and middle age stands does not exceed 0.7; (ii) at 1 m height from the ground, the visibility extends over 30‒70 m distance; (iii) heterogeneous tree layer with gaps up to 0.2 ha in size; (iv) occurrence of potential lekking trees for Capercaillie – middle-height and -age pines having strong long bottom branches where the birds could easily fly from different sides; (v) at least 20 items per hectare of large (diameter >25 cm) fallen deadwood and standing dead trees (snags); (vi) presence of 10‒15 undergrowth spruces per hectare; (vii) first (or second) forest stand storey spruces (7‒9 trees/ha) or 2 groups of spruces (0.08‒0.1 ha area) per ha; (vii) the ground vegetation dominated by bilberry or cotton-grass.

Tree harvesting in lek sites is carried out gradually in 2‒3 phases, equalizing harvested volumes between phases and keeping at least two-year intervals. The felled wood is removed or, if that is not possible, the trees are debranched and bucked on-site. Vegetation removal from drainage ditches can take place during the same entries.

*2.3. Temporal restrictions*

Management of Capercaillie habitat in designated lek sites, micro-reserves and their buffer areas is not carried out between 1 March and 31 July. On the lek area outside these, any forest management activities that may negatively impact Capercaillie reproduction are not carried out between 1 March and 30 June; these activities including logging, chipping of felling residues, tending of young stands and soil preparation, road building and reconstruction, management of drainage systems (except elimination of beaver dams). Transportation of LVM cargoes by LVM roads that pass through the lek area in the period from 1 March till 31 May is only allowed in daylight hours 10:00 till 16:00.
